# Supplementary material for: Exposure of Fexofenadine, but Not Pseudoephedrine, Is Markedly Decreased by Green Tea Extract in Healthy Volunteers
Source: PubMed Central journal article supplement — Clin Pharmacol Ther. 2022 Jun 29;112(3):627–34. doi: 10.1002/cpt.2682 (PMC9540489; doi:10.1002/cpt.2682), 2022-06-29
Supplement: CPT-112-627-s002.pdf [file CPT-112-627-s002.pdf]

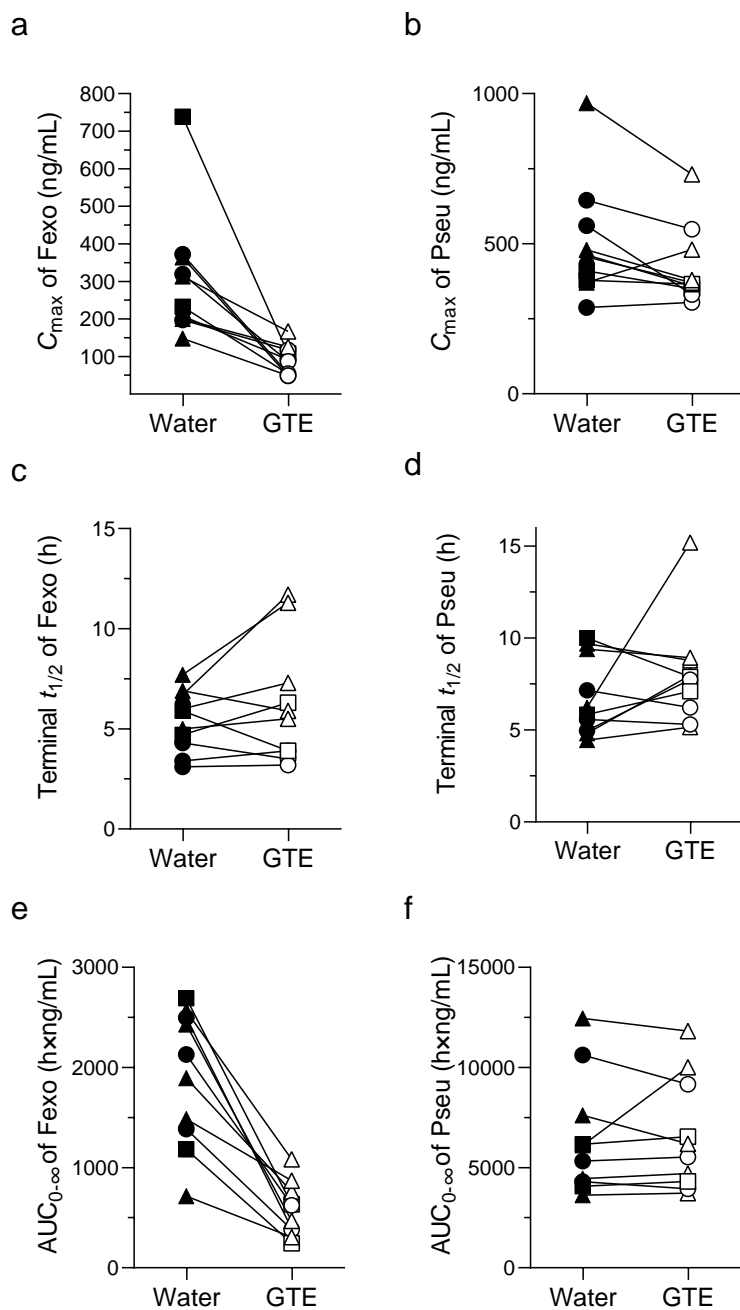

**Figure S1 Individual differences in  $C_{max}$  (a and b), terminal  $t_{1/2}$  (c and d), and  $AUC_{0-\infty}$  (e and f) of fexofenadine (Fexo) and pseudoephedrine (Pseu) after oral administration with an aqueous solution of green tea extract or water in 10 healthy volunteers genotyped as *SLCO2B1* *\*1/\*1* (circle), *\*1/\*3* (triangle), and *\*3/\*3* (square).**
