# Supplementary material for: Exposure of Fexofenadine, but Not Pseudoephedrine, Is Markedly Decreased by Green Tea Extract in Healthy Volunteers
Source: PubMed Central journal article supplement — Clin Pharmacol Ther. 2022 Jun 29;112(3):627–34. doi: 10.1002/cpt.2682 (PMC9540489; doi:10.1002/cpt.2682), 2022-06-29
Supplement: CPT-112-627-s003.pdf [file CPT-112-627-s003.pdf]

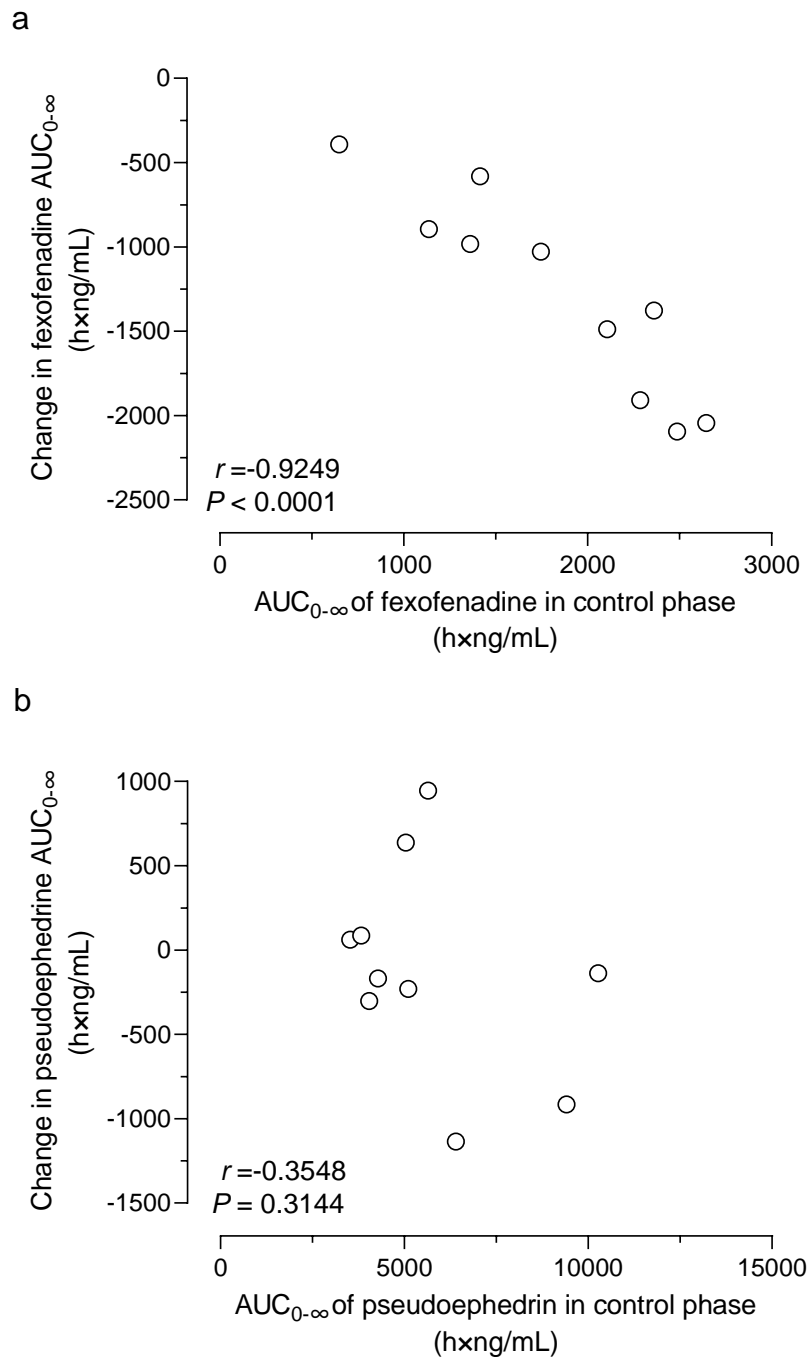

**Figure S2** Change in area under the plasma concentration–time curve ( $AUC_{0-\infty}$ ) of fexofenadine (a) and pseudoephedrine (b) between water and green tea extract phases plotted against  $AUC_{0-\infty}$  in water phase for each individual ( $n = 10$ ).
