# Supplementary material for: Exposure of Fexofenadine, but Not Pseudoephedrine, Is Markedly Decreased by Green Tea Extract in Healthy Volunteers
Source: PubMed Central journal article supplement — Clin Pharmacol Ther. 2022 Jun 29;112(3):627–34. doi: 10.1002/cpt.2682 (PMC9540489; doi:10.1002/cpt.2682), 2022-06-29
Supplement: CPT-112-627-s004.pdf [file CPT-112-627-s004.pdf]

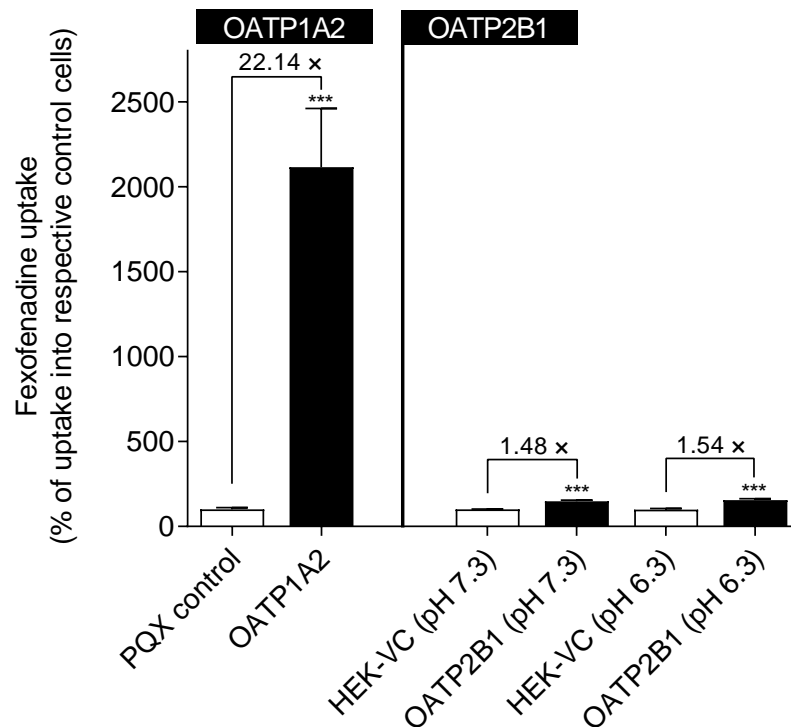

**Figure S3 Comparison of OATP1A2- (left) and OATP2B1-mediated (right) fexofenadine (10  $\mu$ M) uptake.**

For OATP1A2, HEK-PQQ (PQQ control) and HEK-OATP1A2 (OATP1A2) cells, for OATP2B1, HEK-VC/418 (HEK-VC) and HEK-OATP2B1 (OATP2B1) cells were used. Uptake was measured at pH 7.3 for OATP1A2 and OATP2B1 and in addition at pH 6.3 for OATP2B1. Uptake into control cells was set to 100% and the respective uptake values were given related to this value. The x-fold uptake compared to the uptake into the control cells is mentioned above the columns. Mean  $\pm$  SEM ( $n = 6 - 8$ ). \*\*\*  $P < 0.001$  vs. uptake into control cells.
