# Supplementary material for: Exposure of Fexofenadine, but Not Pseudoephedrine, Is Markedly Decreased by Green Tea Extract in Healthy Volunteers
Source: PubMed Central journal article supplement — Clin Pharmacol Ther. 2022 Jun 29;112(3):627–34. doi: 10.1002/cpt.2682 (PMC9540489; doi:10.1002/cpt.2682), 2022-06-29
Supplement: CPT-112-627-s005.pdf [file CPT-112-627-s005.pdf]

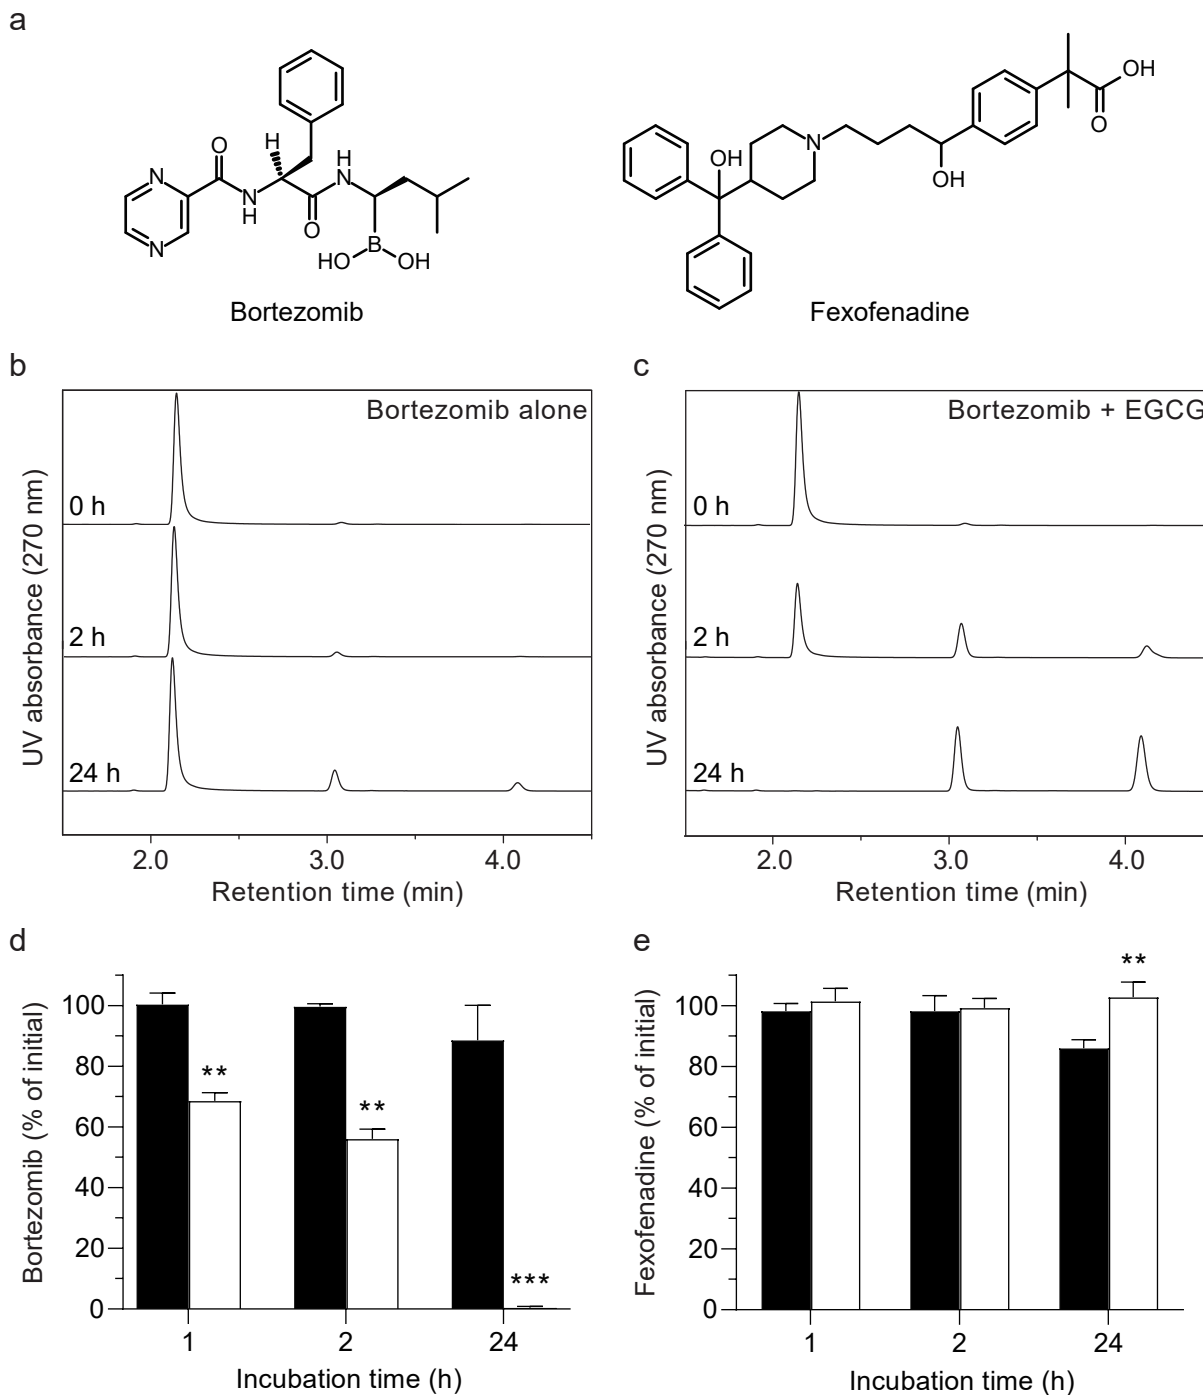

**Figure S4 In vitro chemical interaction assay of epigallocatechin gallate (EGCG) with bortezomib (20  $\mu\text{g}/\text{mL}$ ) and fexofenadine (400  $\mu\text{g}/\text{mL}$ ).**

(a) Chemical structures of bortezomib and fexofenadine. Representative chromatograms of bortezomib in the absence (b) or presence (c) of EGCG (1 mg/mL) at 0, 2, and 24 h.

Degradation of bortezomib (d) and fexofenadine (e) by coincubation with (white) or without (black, control) EGCG (4 mg/mL) at 37°C for 1, 2, and 24 h.

Mean  $\pm$  SD ( $n = 3$ ). \*\*, \*\*\*,  $P < 0.01$  and 0.001, respectively, vs. control.
